# Supplementary material for: A dual-response BODIPY-based fluorescent probe for the discrimination of glutathione from cystein and homocystein
Source: Royal Society of Chemistry journal article supplement (doi:10.1039/c5sc00216h), 2015-01-01

*Electronic Supplementary Information (ESI)*

**A dual-response BODIPY-based fluorescent probe for the discrimination of Glutathione from Cystein and Homocystein**

Feiyi Wang,<sup>a</sup> Li Zhou,<sup>b</sup> Chunchang Zhao,<sup>\*a</sup> Rui Wang,<sup>b</sup> Qiang Fei,<sup>a</sup> Sihang Luo,<sup>a</sup> Zhiqian Guo,<sup>a</sup> He Tian,<sup>a</sup> Wei-Hong Zhu<sup>\*a</sup>

<sup>a</sup> Key Laboratory for Advanced Materials and Institute of Fine Chemicals, Shanghai Key Laboratory of Functional Materials Chemistry, Collaborative Innovation Center for Coal Based Energy (i-CCE), East China University of Science & Technology, Shanghai 200237, P. R. China. E-mail: zhaocchang@ecust.edu.cn, whzhu@ecust.edu.cn.

<sup>b</sup> Shanghai Key Laboratory of New Drug Design, School of Pharmacy, East China University of Science & Technology, Shanghai 200237, P. R. China.

**Table of Contents**

|                                                                                        |                |
|----------------------------------------------------------------------------------------|----------------|
| <b>1. Time dependent spectral changes of BODIPY-S in the presence of thiols. ....</b>  | <b>S2</b>      |
| <b>2. MS of BODIPY-S with GSH, Cys and Hcy.....</b>                                    | <b>S3</b>      |
| <b>3. Photophysical spectra of BODIPY 4 and BODIPY-S +Cys.....</b>                     | <b>S4</b>      |
| <b>4. Time dependent Spectral changes of S-S-BODIPY in the presence of thiols. ...</b> | <b>S5</b>      |
| <b>5. NMR and MS of the product of S-S-BODIPY with thiols.....</b>                     | <b>S6</b>      |
| <b>6. Reaction mechanism .....</b>                                                     | <b>S7</b>      |
| <b>7. Pseudo first-order kinetic plot.....</b>                                         | <b>S8</b>      |
| <b>8. HRMS of S-S-BODIPY-S with thiols .....</b>                                       | <b>S9-S10</b>  |
| <b>9. Time-dependent spectral changes of S-S-BODIPY-S with Cys/Hcy.....</b>            | <b>S11</b>     |
| <b>10. The easy-to-monitor fluorescence color change.....</b>                          | <b>S12</b>     |
| <b>11. Fluorescent confocal image of cells. ....</b>                                   | <b>S12</b>     |
| <b>12. Experimental section.....</b>                                                   | <b>S13-S15</b> |
| <b>13. NMR and HRMS spectra.....</b>                                                   | <b>S16-S21</b> |

# 1. Time-dependent spectral changes of BODIPY-S in the presence of thiols.

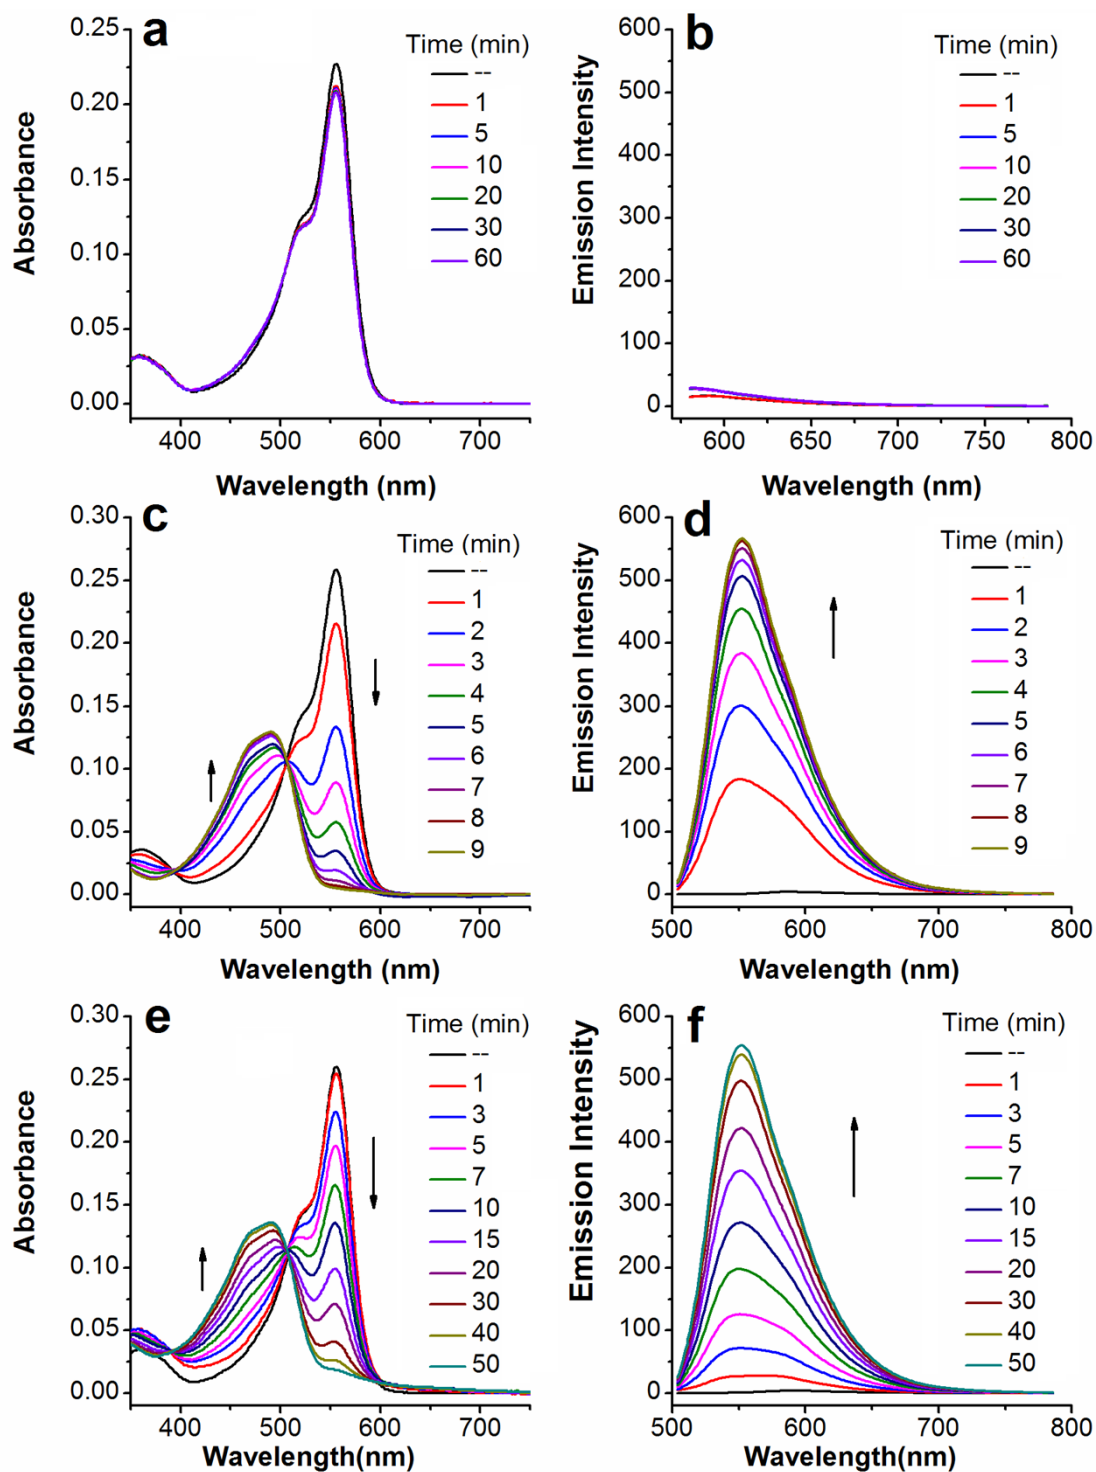

**Fig. S1** Time-dependent spectral changes of **BODIPY-S** (5  $\mu$ M) in the absence and presence of 5 mM thiols in acetonitrile / HEPES buffer (1:1, v/v , 20 mM, pH 7.4) at 37  $^{\circ}$ C. GSH: (a) Absorption and (b) emission spectra,  $\lambda_{\text{ex}} = 565$  nm. Cys: (c) Absorption and (d) emission spectra,  $\lambda_{\text{ex}} = 480$  nm. Hcy: (e) Absorption and (f) emission spectra,  $\lambda_{\text{ex}} = 480$  nm.

## 2. MS of BODIPY-S with GSH, Cys and Hcy.

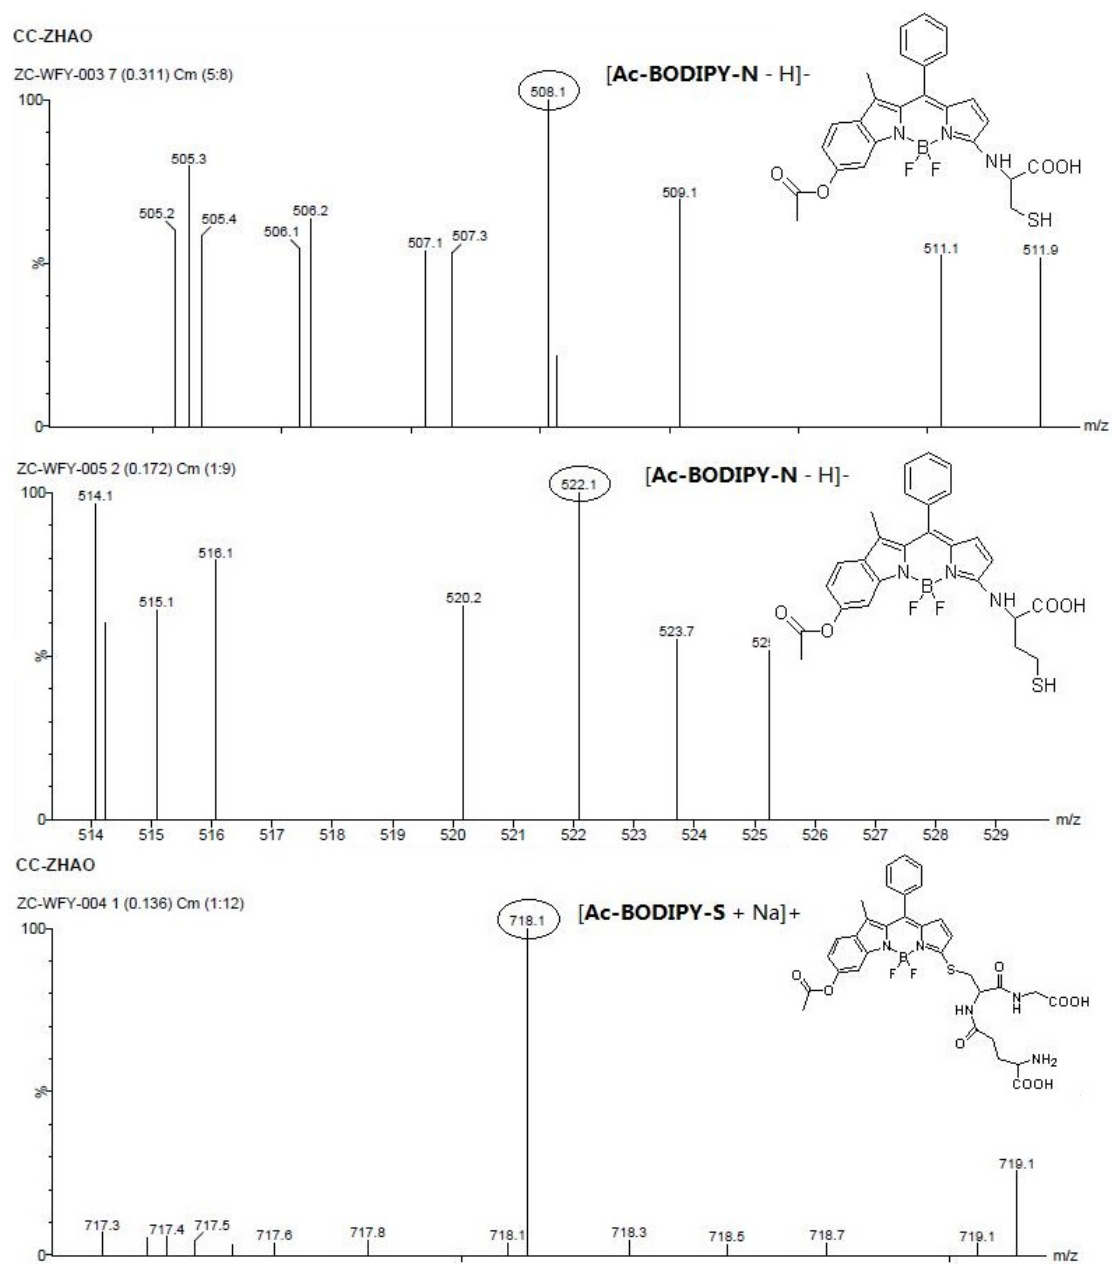

**Fig. S2** MS spectra of the products from **BODIPY-S** with thiols.

### 3. Photophysical spectra of BODIPY 4 and BODIPY-S +Cys.

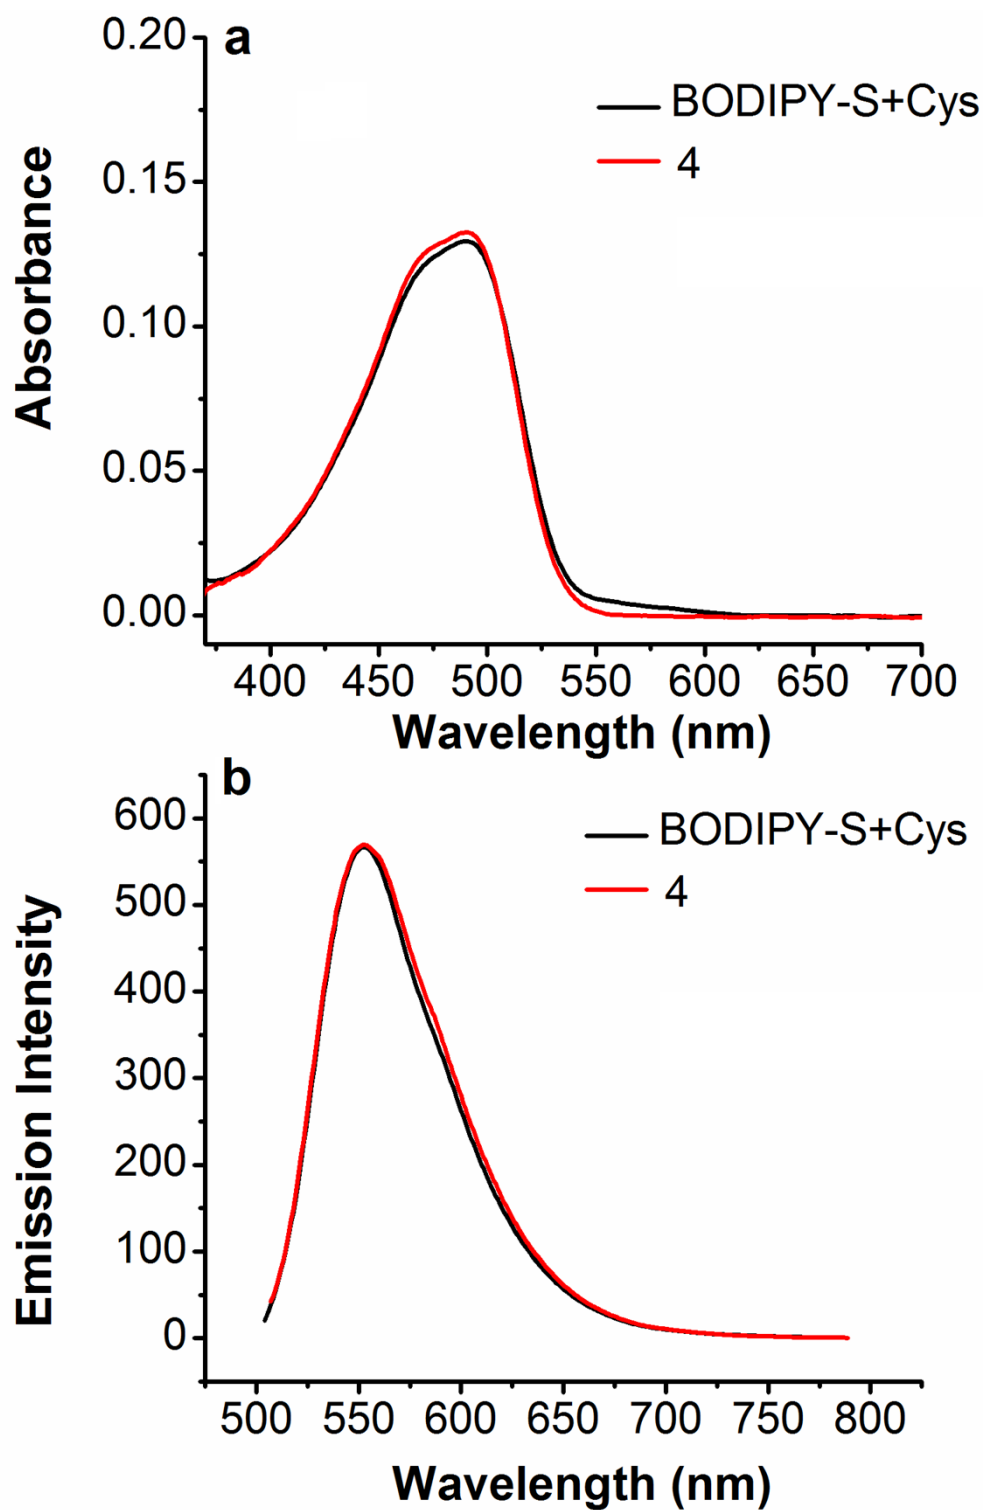

**Fig. S3** Photophysical spectra of BODIPY 4 and BODIPY-S + Cys.

#### 4. Time dependent spectral changes of S-S-BODIPY in the presence of thiols.

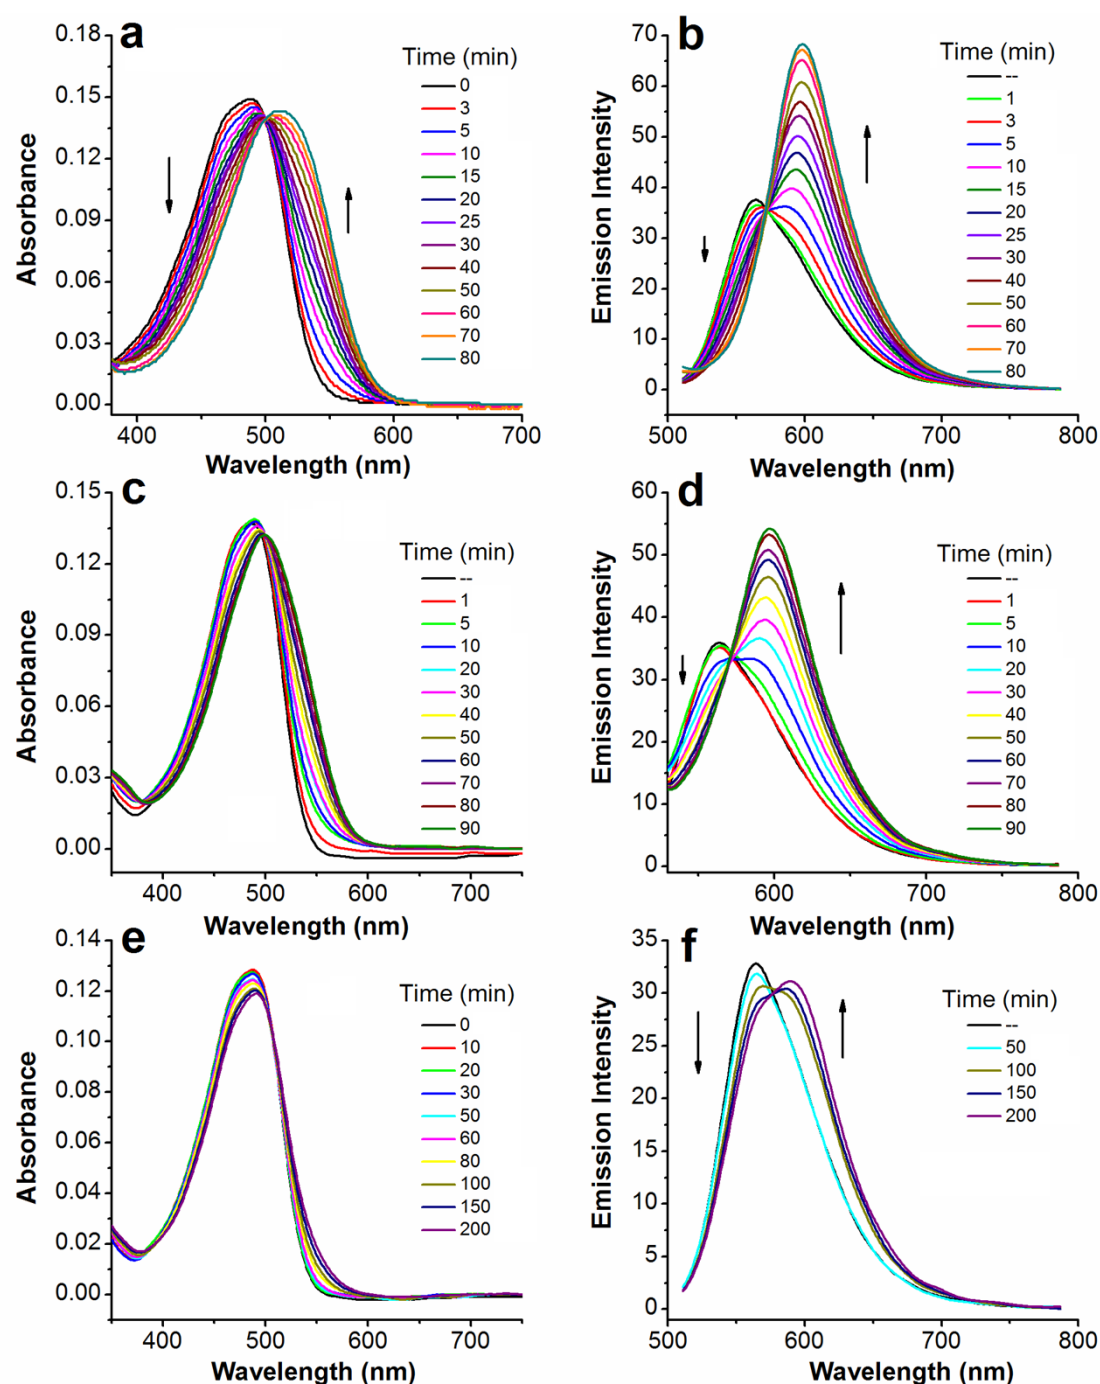

**Fig. S4** Time-dependent spectral changes of **S-S-BODIPY** (5  $\mu$ M) in the absence and presence of 5 mM thiols in acetonitrile / HEPES buffer (1:1, v/v, 20 mM, pH 7.4) at 37 °C. Cys: (a) Absorption and (b) emission spectra,  $\lambda_{\text{ex}} = 487$  nm. Hcy: (c) Absorption and (d) emission spectra,  $\lambda_{\text{ex}} = 487$  nm. GSH: (e) absorption and (f) emission spectra,  $\lambda_{\text{ex}} = 487$  nm.

## 5. $^1\text{H}$ NMR and HRMS of the product from S-S-BODIPY with thiols.

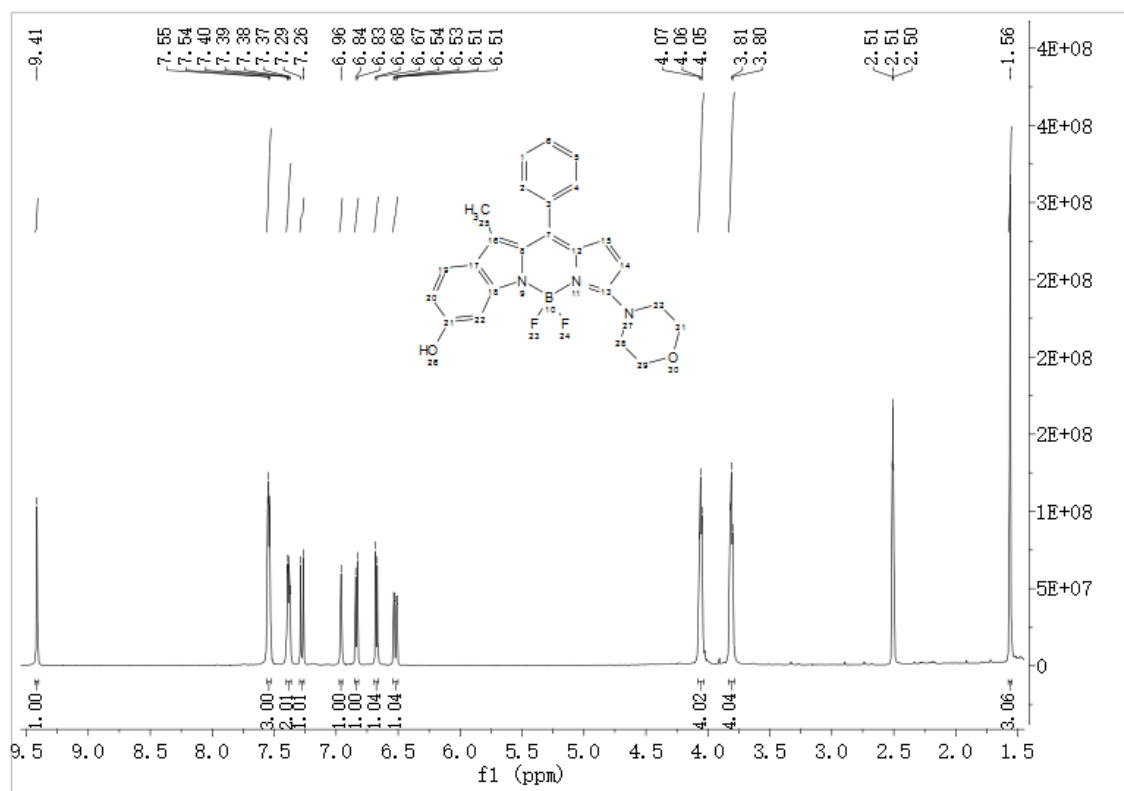

### Elemental Composition Report

#### Single Mass Analysis

Tolerance = 30.0 mDa / DBE: min = -1.5, max = 100.0

Element prediction: Off

Number of isotope peaks used for i-FIT = 2

Monoisotopic Mass, Even Electron Ions

163 formula(e) evaluated with 21 results within limits (up to 1 best isotopic matches for each mass)

Elements Used:

C: 0-31 H: 0-33 11B: 0-1 N: 0-3 O: 0-2 F: 0-2

CC-ZHAO

ECUST institute of Fine Chem

ZC-WFY-008 36 (1.182) Cm (36:37)

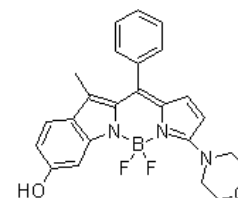

30-Jul-2014  
20:32:49  
1: TOF MS ES+  
1.02e+003

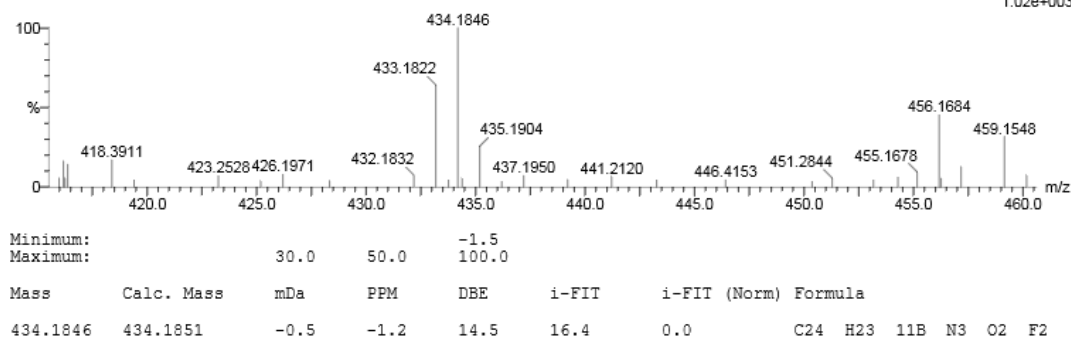

**Fig. S5** The characterization of the product from S-S-BODIPY with GSH, Cys or Hcy.

## 6. Reaction mechanism.

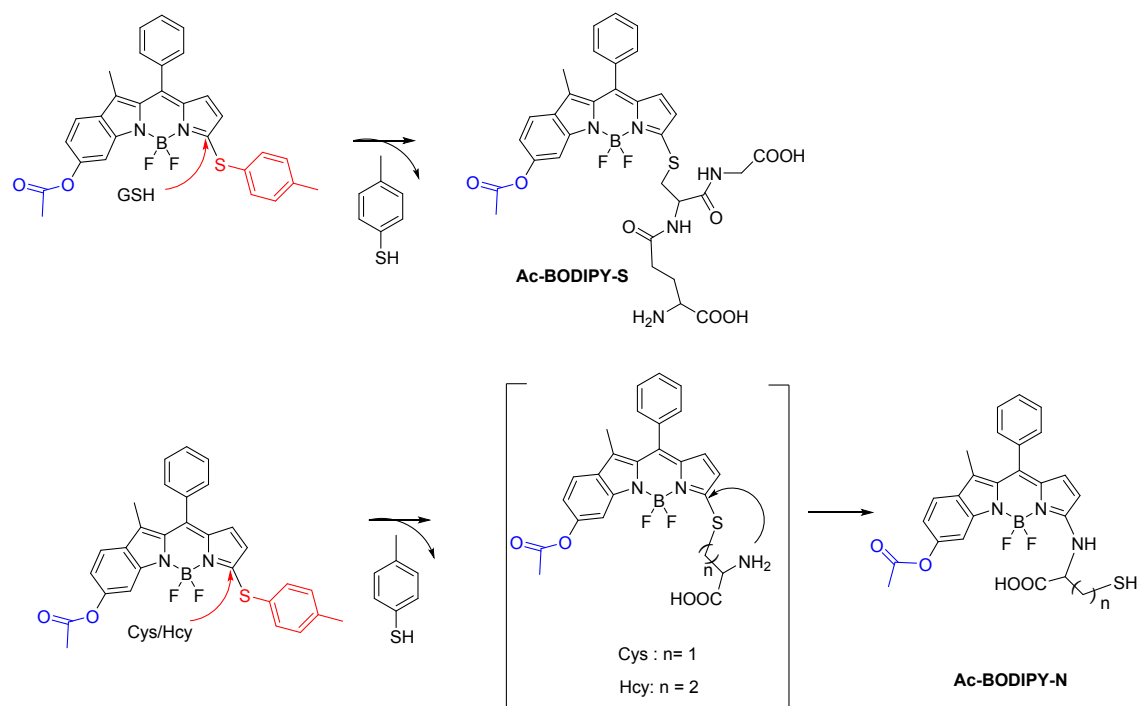

**Scheme S1.** Reaction mechanism of compound **BODIPY-S** toward GSH, Cys/Hcy.

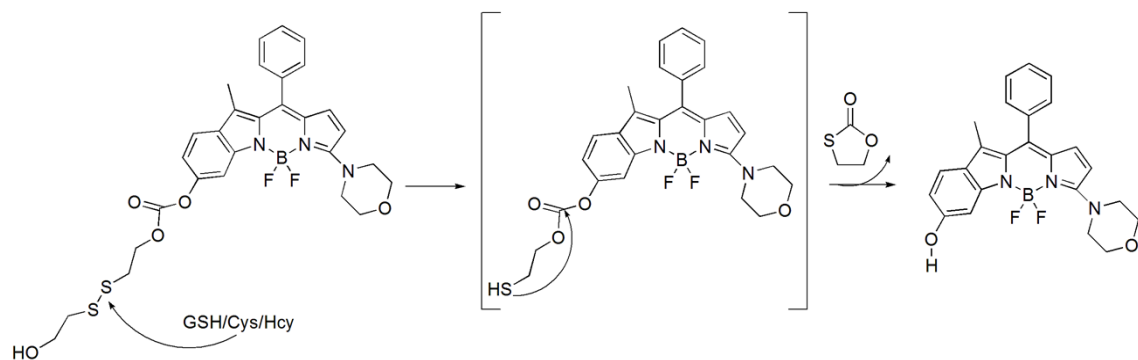

**Scheme S2.** Reaction mechanism of compound **S-S-BODIPY** toward GSH, Cys/Hcy.

## 7. Pseudo first-order kinetic plot.

Time-course kinetic measurements of **S-S-BODIPY-S** with GSH were performed using the fluorescence intensity at 605 nm. Data were collected under pseudo-first-order conditions. Spectra were acquired in acetonitrile / HEPES buffer (1:1, v/v, 20 mM, pH 7.4) at 37 °C. The pseudo-first-order rate constant for the reaction was determined by fitting the fluorescence intensity changes of the samples to the pseudo first-order equation:  $\ln((I_{\max}-I_t)/I_{\max})) = -k_{\text{obs}} t$ .

Where  $I_t$  and  $I_{\max}$  represent the fluorescence intensities at times  $t$  and the maximum value obtained after the reaction was complete.  $k_{\text{obs}}$  is the observed rate constant.

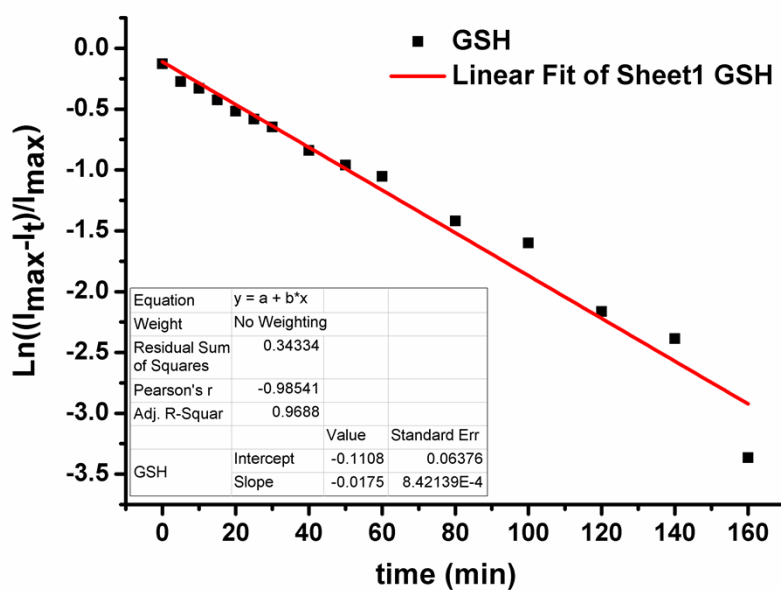

**Fig. S6** Pseudo first-order kinetic plots of the reaction of **S-S-BODIPY-S** (5  $\mu$ M) with GSH (5 mM).



## 8. HRMS of S-S-BODIPY-S with thiols.

### Elemental Composition Report

#### Single Mass Analysis

Tolerance = 30.0 mDa / DBE: min = -1.5, max = 100.0

Element prediction: Off

Number of isotope peaks used for i-FIT = 2

Monoisotopic Mass, Even Electron Ions

556 formula(e) evaluated with 1 results within limits (up to 1 best isotopic matches for each mass)

Elements Used:

C: 0-30 H: 0-33 11B: 0-1 N: 0-5 O: 0-7 F: 0-2 S: 0-1

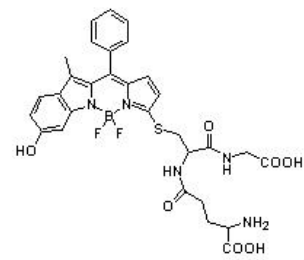

1: TOF MS ES+  
4.28e+002

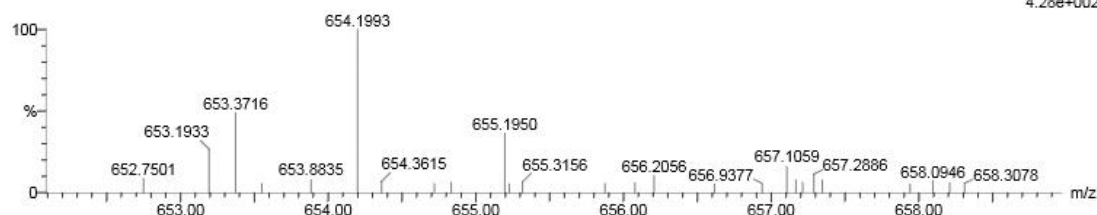

Minimum:

Maximum:

30.0 50.0

-1.5

100.0

| Mass     | Calc. Mass | mDa  | PPM  | DBE  | i-FIT | i-FIT (Norm) | Formula                |
|----------|------------|------|------|------|-------|--------------|------------------------|
| 654.1993 | 654.2005   | -1.2 | -1.8 | 17.5 | 41.9  | 0.0          | C30 H31 11B N5 O7 F2 S |

### Elemental Composition Report

#### Single Mass Analysis

Tolerance = 30.0 mDa / DBE: min = -1.5, max = 100.0

Element prediction: Off

Number of isotope peaks used for i-FIT = 2

Monoisotopic Mass, Even Electron Ions

200 formula(e) evaluated with 1 results within limits (all results (up to 1000) for each mass)

Elements Used:

C: 0-23 H: 0-150 11B: 0-1 N: 0-3 O: 0-3 F: 0-2 S: 0-1

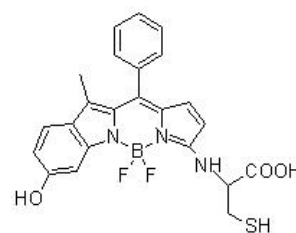

TOF MS ES-  
1.45e+003

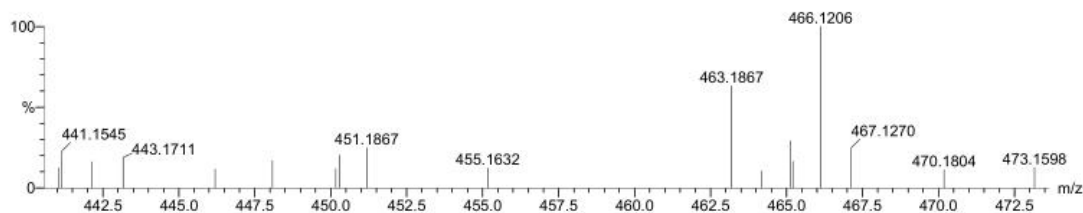

Minimum:

Maximum:

30.0 50.0

-1.5

100.0

| Mass     | Calc. Mass | mDa  | PPM  | DBE  | i-FIT | i-FIT (Norm) | Formula                |
|----------|------------|------|------|------|-------|--------------|------------------------|
| 466.1206 | 466.1208   | -0.2 | -0.4 | 15.5 | 9.5   | 0.0          | C23 H19 11B N3 O3 F2 S |

## Elemental Composition Report

### Single Mass Analysis

Tolerance = 30.0 mDa / DBE: min = -1.5, max = 100.0

Element prediction: Off

Number of isotope peaks used for i-FIT = 2

Monoisotopic Mass, Even Electron Ions

279 formula(e) evaluated with 37 results within limits (up to 1 best isotopic matches for each mass)

Elements Used:

C: 0-31 H: 0-33 11B: 0-1 N: 0-3 O: 0-3 F: 0-2 S: 0-1

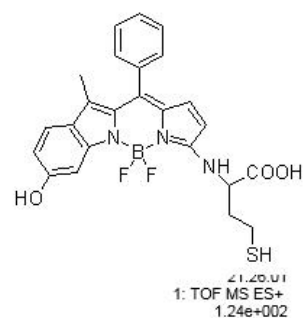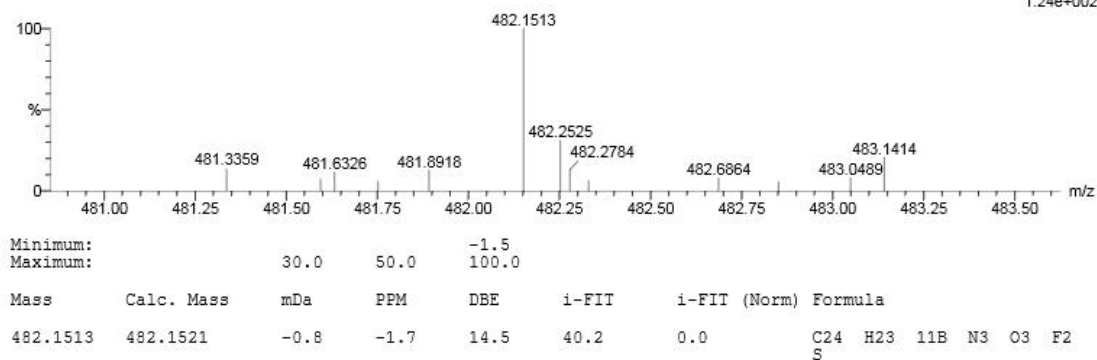

**Fig. S7** HRMS spectra of the products from **S-S-BODIPY-S** with thiols.

## 9. Time-dependent spectral changes of S-S-BODIPY-S in the presence of Cys/Hcy.

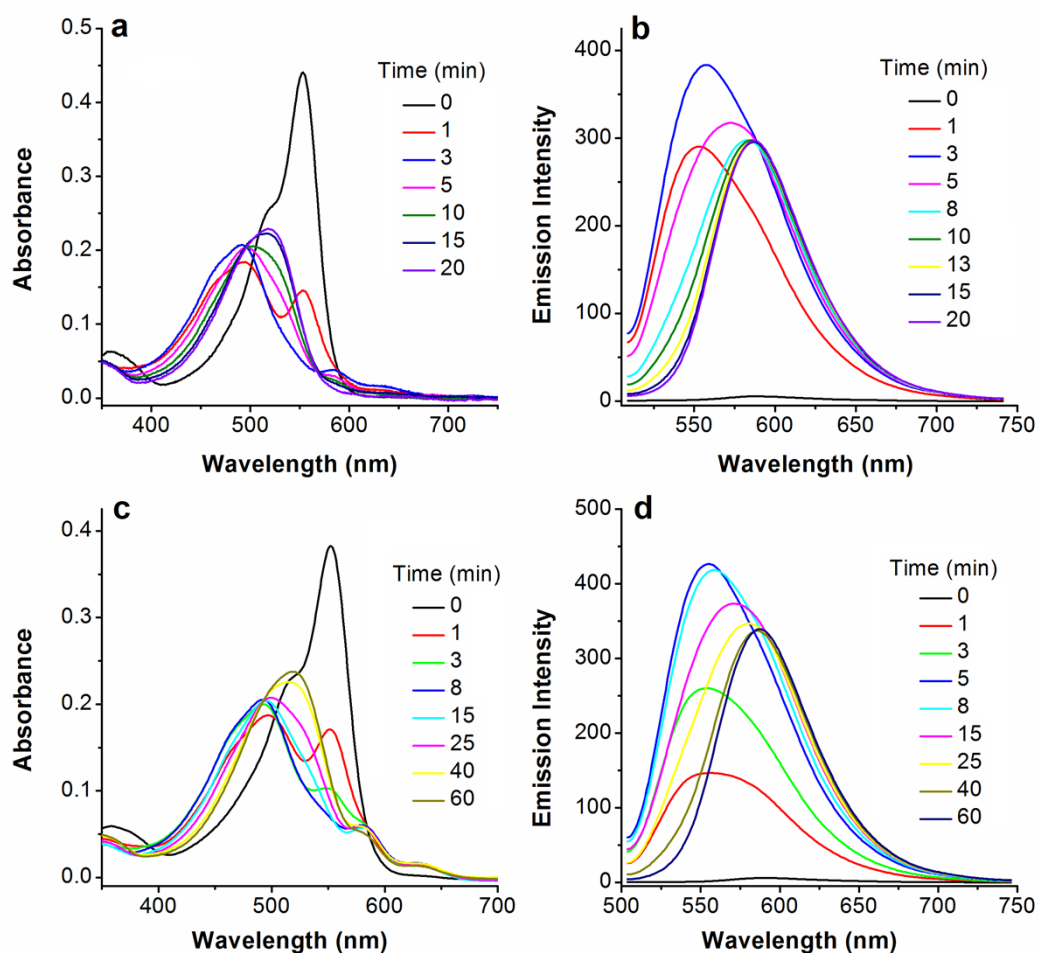

**Fig. S8** Time-dependent spectral changes of S-S-BODIPY-S (5  $\mu$ M) in the absence and presence of Cys (5 mM) or Hcy (5 mM) in acetonitrile / HEPES buffer (1:1, v/v, 20 mM, pH 7.4) at 37  $^{\circ}$ C. Cys: (a) absorption and (b) emission spectra; Hcy: (c) absorption and (d) emission spectra.  $\lambda_{\text{ex}}$  = 490 nm.

## 10. The easy-to-monitor fluorescence color change.

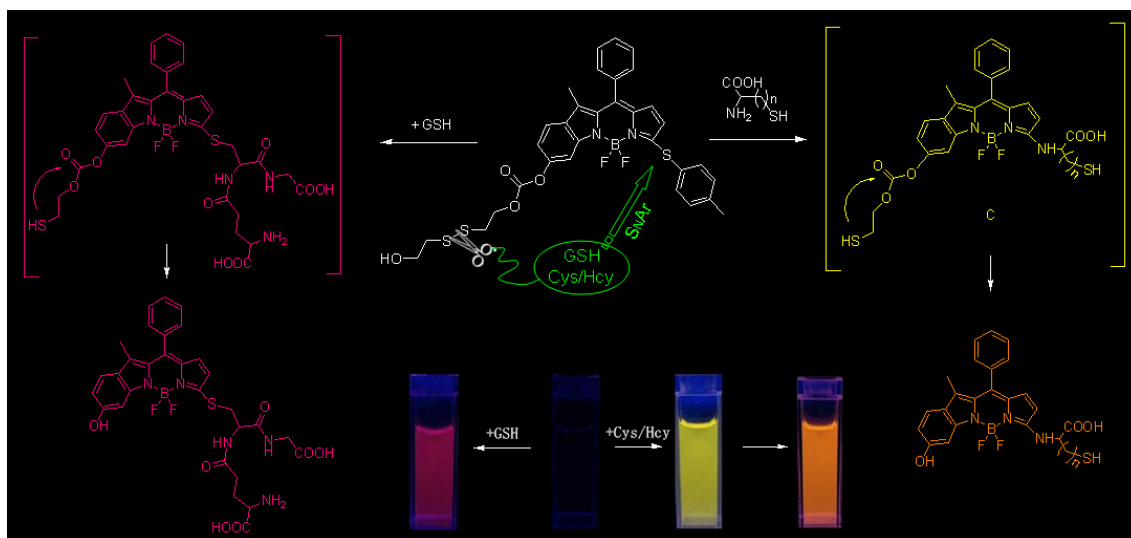

**Fig. S9** Fluorescence color changes in the presence of Cys, Hcy and GSH.

## 11. Fluorescent confocal image of cells.

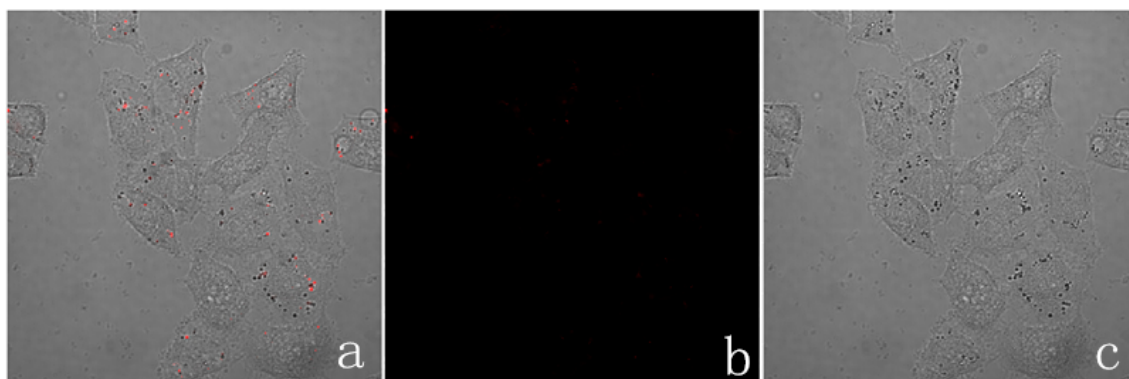

**Fig. S10** Fluorescent confocal image of cells: (a-c) HeLa cells pretreated with 500  $\mu\text{M}$  *N*-methylmaleimide for 20 min, then incubated with S-S-BODIPY-S (10  $\mu\text{M}$ ) for 4 h, the excitation wavelength was 561 nm and the emission was collected at 600-645 nm, (a) overlap field, (b) fluorescence image, (c) bright filed.

## 12. Experimental section

**Materials.** Unless other specified, all chemical reagents and solvents for synthesis were purchased from commercial suppliers and were used without further purification. Anhydrous dichloromethane was dried over  $\text{CaH}_2$  and distilled prior to use.

**Instruments.** NMR spectra were recorded on a Bruker AV-400 spectrometer with chemical shifts reported in ppm at room temperature. Mass spectra were obtained on a HP 1100 LC-MS spectrometer. UV-vis absorption spectra were recorded on a Varian Cary 100 spectrophotometer. Fluorescence spectra were measured with a Varian Cary Eclipse Fluorescence spectrophotometer. Spectral-grade solvents were used for measurements of UV-vis absorption and fluorescence. For absorption or fluorescence measurements, compounds were dissolved in  $\text{CH}_3\text{CN}$  to obtain stock solutions (5.0 mM), followed by diluting with aqueous buffer solutions to the desired concentrations.

**Cells culture and imaging.** HeLa cells and MKN-45 cells were cultured in Roswell Park Memorial Institute 1640 medium (RPMI-1640) supplemented with 10% fetal bovine serum (FBS) in a humidified atmosphere of 5/95  $\text{CO}_2$ /air incubator for 24 h at 37 °C. For confocal fluorescence imaging, cells were incubated in glass bottom dishes for 24 h. Cells were incubated at 37 °C with 10  $\mu\text{M}$  **S-BODIPY-S** for 4 h, washed with D-Hanks and fluorescence images were captured. In a control experiment, Hela cells were pre-treated with *N*-methylmaleimide (500  $\mu\text{M}$ ) for 20 min at 37 °C, and then washed with D-Hanks. These cells were further loaded with 10  $\mu\text{M}$  **S-BODIPY-S** for 4 h, washed with D-Hanks. Samples were excited at 514 nm and observed between 600-620 nm for the red channel and 560-580 nm for the orange channel.

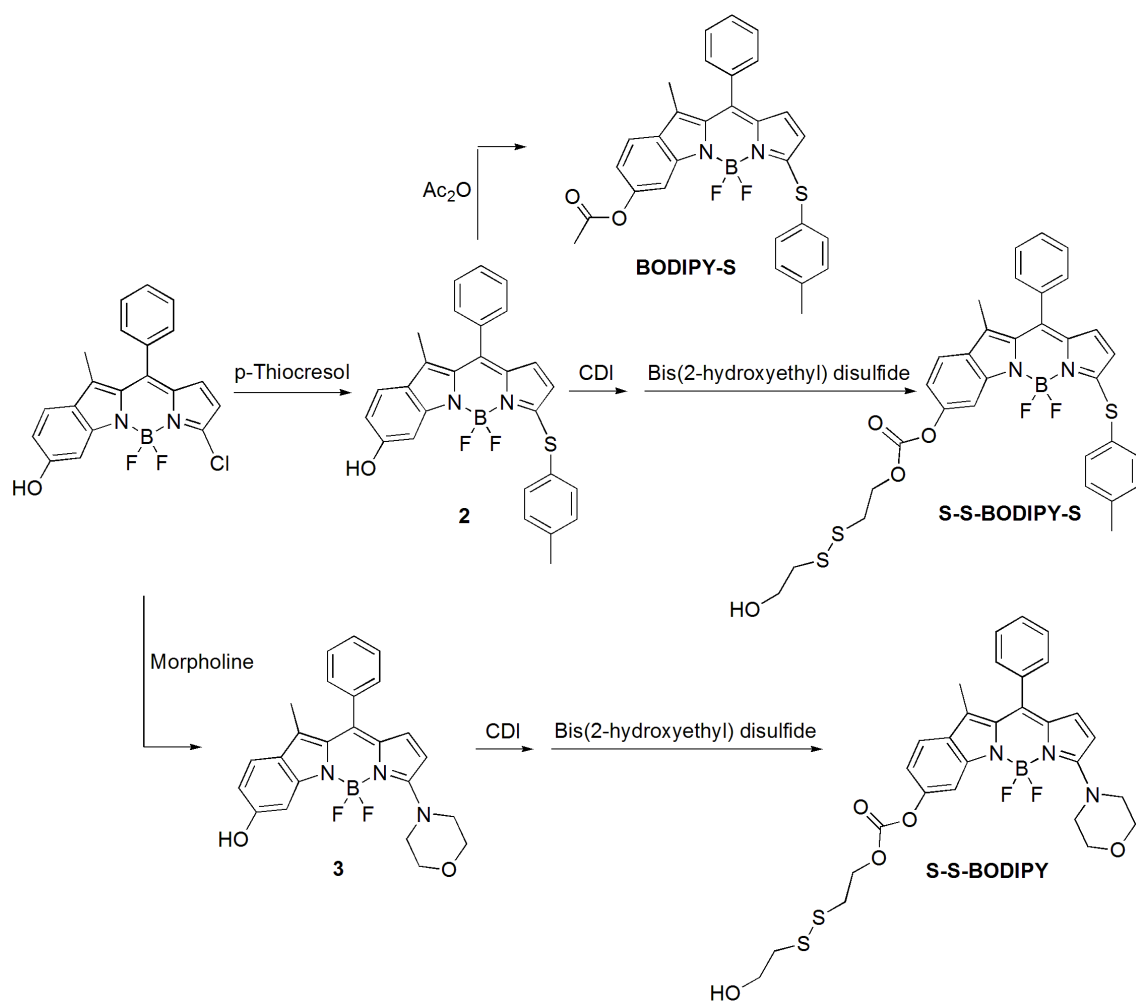

**Synthesis of Compound 2.** HO-BODIPY-Cl (100 mg, 0.3 mmol) and *p*-thiocresol (39 mg, 0.3 mmol) were dissolved in CH<sub>3</sub>CN (30 ml), and then DMAP (38 mg, 0.3 mmol) was added, the mixture was stirred for 1 h at room temperature under N<sub>2</sub> atmosphere. The solvent was then removed under vacuum, the resulting residue was purified by column chromatography on silica gel to afford the compound **2** (102 mg, yield: 83%). <sup>1</sup>H NMR (*d*<sub>6</sub>-DMSO, 400 MHz, ppm): δ 10.51 (s, 1H), 7.60-7.54 (m, 5H), 7.48-7.43 (m, 3H), 7.38-7.36 (d, *J* = 8.4 Hz, 2H), 6.90 (s, 1H), 6.63-6.60 (dd, *J*<sub>1</sub> = 2.0 Hz, *J*<sub>2</sub> = 8.8 Hz, 1H), 6.55-6.53 (d, *J* = 4.8 Hz, 1H), 5.87-5.86 (d, *J* = 4.8 Hz, 1H), 2.38 (s, 3H), 1.68 (s, 3H). HRMS (ESI, *m/z*): [M - H]<sup>-</sup> calcd for C<sub>27</sub>H<sub>20</sub>BF<sub>2</sub>N<sub>2</sub>OS: 469.1357, Found: 469.1364.

**Synthesis of Compound 3.** To a solution of HO-BODIPY-Cl (0.10 g, 0.3 mmol) in 30 mL CH<sub>3</sub>CN was added morpholine (30 mg, 0.3 mmol), the mixture was then stirred for 30 min at room temperature, washed with water, dried over anhydrous Na<sub>2</sub>SO<sub>4</sub>. The solvent was evaporated in vacuo. The residue was purified by flash chromatography (silica gel, eluent: ethyl acetate/petroleum 1:5) to afford compound **3** (0.100 g, yield: 88%). <sup>1</sup>H NMR (*d*<sub>6</sub>-DMSO, 400 MHz, ppm): δ 9.41 (s, 1H), 7.55-7.54 (m, 3H), 7.40-7.37 (m, 2H), 7.29-7.26 (d, *J* = 8.8 Hz, 1H), 6.96 (s, 1H), 6.84-6.83 (d, *J* = 5.2 Hz, 1H), 6.68-6.67 (d, *J* = 5.2 Hz, 1H), 6.54-6.51 (dd, *J*<sub>1</sub> = 2.0 Hz, *J*<sub>2</sub> = 8.8 Hz, 1H), 4.07-4.05 (t, *J* = 4.4 Hz, 4H), 3.82-3.80 (t, *J* = 4.4 Hz, 4H), 1.56 (s, 3H). HRMS (ESI, *m/z*): [M + H]<sup>+</sup> calcd for C<sub>24</sub>H<sub>23</sub>BF<sub>2</sub>N<sub>3</sub>O<sub>2</sub>: 434.1851, Found: 434.1846.

**Compound BODIPY-S.** To a solution of Compound **2** (50 mg, 0.1 mmol) and DMAP (20 mg, 0.2 mmol) in 30 mL anhydrous DCM was added acetic anhydride (16 mg, 0.2 mmol) at room temperature, the reaction mixture was stirred for 1 h under argon. Then the reaction

mixture was washed with water. The organic layer was dried with Na<sub>2</sub>SO<sub>4</sub>, and evaporated under vacuum. The resulting residue was purified by column chromatography on silica gel to get compound **BODIPY-S** (45 mg, yield 83%). <sup>1</sup>H NMR (CDCl<sub>3</sub>, 400 MHz, ppm): δ 7.58-7.56 (d, *J* = 8.4 Hz, 2H), 7.52-7.50 (m, 4H), 7.46-7.44 (d, *J* = 8.8 Hz, 1H), 7.37-7.35 (m, 2H), 7.29-7.27 (d, *J* = 8.0 Hz, 2H), 6.81-6.78 (dd, *J*<sub>1</sub> = 2.0 Hz, *J*<sub>2</sub> = 8.8 Hz, 1H), 6.58-6.57 (d, *J* = 4.8 Hz, 1H), 5.94-5.92 (d, *J* = 4.8 Hz, 1H), 2.42 (s, 3H), 2.33 (s, 3H), 1.74 (s, 3H); <sup>13</sup>C NMR (CDCl<sub>3</sub>, 100 MHz, ppm): δ 169.43, 152.14, 145.89, 141.25, 141.09, 141.02, 135.40, 134.09, 132.35, 132.18, 130.75, 129.64, 129.54, 129.29, 128.60, 124.62, 121.91, 121.36, 116.16, 107.49, 29.71, 21.18, 11.85. HRMS (ESI, *m/z*): [M + Na]<sup>+</sup> calcd for C<sub>29</sub>H<sub>23</sub>BF<sub>2</sub>N<sub>2</sub>NaO<sub>2</sub>S: 535.1434, Found: 535.1439.

**Compound S-S-BODIPY.** Compound **3** (100 mg, 0.2 mmol) was dissolved in 1,2-dichloroethane. 1,1'-Carbonyldiimidazole (75 mg, 0.5 mmol) was added to the above solution, the reaction mixture was stirred for 12 h at 40 °C under argon. To the reaction mixture was added bis(2-hydroxyethyl)disulfide (106 mg, 0.7 mmol), the resulting reaction mixture was then refluxed for 24 h. After cooling to room temperature, the solvent was removed under vacuum. The resulting residue was purified by column chromatography on silica gel (ethyl acetate / petroleum = 1: 7) to afford the compound **S-S-BODIPY** as a red solid (28 mg, yield 20%). <sup>1</sup>H NMR (CDCl<sub>3</sub>, 400 MHz, ppm): δ 7.56 (s, 1H), 7.49-7.47 (m, 3H), 7.45-7.42 (d, *J* = 8.8 Hz, 1H), 7.35-7.33 (m, 2H), 6.87-6.84 (dd, *J*<sub>1</sub> = 2.0 Hz, *J*<sub>2</sub> = 8.8 Hz, 1H), 6.75-6.74 (d, *J* = 5.2 Hz, 1H), 6.34-6.33 (d, *J* = 5.6 Hz, 1H), 4.54-4.50 (t, *J* = 6.8 Hz, 2H), 4.08-4.06 (m, 4H), 3.93-3.89 (m, 6H), 3.06-3.03 (t, *J* = 6.8 Hz, 2H), 2.93-2.90 (t, *J* = 5.6 Hz, 2H), 1.67 (s, 3H); <sup>13</sup>C NMR (CDCl<sub>3</sub>, 100 MHz, ppm): δ 153.77, 149.53, 141.94, 139.22, 135.90, 135.07, 132.22, 130.02, 129.75, 128.83, 128.40, 122.00, 120.46, 115.12, 113.83, 106.41, 66.87, 66.21, 60.23, 50.82, 41.60, 36.83, 29.71, 10.79. HRMS (ESI, *m/z*): [M + Na]<sup>+</sup> calcd for C<sub>29</sub>H<sub>30</sub>BF<sub>2</sub>N<sub>3</sub>NaO<sub>5</sub>S<sub>2</sub>: 636.1580, Found: 636.1589.

**Compound S-S-BODIPY-S.** The solution of compound **2** (100 mg, 0.2 mmol) and 1,1-carbonyldiimidazole (45 mg, 0.3 mmol) in 1, 2-dichloroethane (30 mL) was stirred for 24 h at 40 °C under argon. The progress of the reaction was monitored by TLC, when the starting material disappeared and a new intermediate appeared, the bis(2-hydroxyethyl)disulfide (98 mg, 0.6 mmol) was then added to the reaction mixture, the resulting mixture was refluxed for 48 h. After cooling to room temperature, the reaction mixture was diluted with CH<sub>2</sub>Cl<sub>2</sub> and washed with water for 3 times, dried over Na<sub>2</sub>SO<sub>4</sub>, and the solvent was removed under vacuo. The residue was purified by flash chromatography (silica gel, eluent: ethyl acetate / petroleum 1:10) to afford **S-S-BODIPY-S** (20 mg, yield 14%); <sup>1</sup>H NMR (CDCl<sub>3</sub>, 400 MHz, ppm): δ 7.61 (s, 1H), 7.58-7.56 (d, *J* = 8.4 Hz, 2H), 7.52-7.50 (m, 3H), 7.48-7.45 (d, *J* = 8.8 Hz, 1H), 7.37-7.35 (m, 2H), 7.29-7.27 (d, *J* = 8.0 Hz, 2H), 8.87-8.85 (dd, *J*<sub>1</sub> = 2.0 Hz, *J*<sub>2</sub> = 8.8 Hz, 1H), 6.60-6.58 (d, *J* = 4.4 Hz, 1H), 5.95-5.94 (d, *J* = 4.4 Hz, 1H), 4.56-4.53 (t, *J* = 6.8 Hz, 2H), 3.94-3.91 (t, *J* = 5.6 Hz, 2H), 3.08-3.05 (t, *J* = 6.8 Hz, 2H), 2.95-2.92 (t, *J* = 5.6 Hz, 2H), 2.42 (s, 3H), 1.74 (s, 3H); <sup>13</sup>C NMR (CDCl<sub>3</sub>, 100 MHz, ppm): δ 153.32, 152.10, 145.52, 141.39, 141.17, 140.98, 135.40, 134.01, 132.54, 131.85, 130.78, 129.75, 129.60, 129.28, 128.63, 124.49, 122.08, 121.57, 115.29, 107.09, 66.46, 60.26, 41.59, 36.73, 21.41, 11.84; HRMS (ESI, *m/z*): [M + Na]<sup>+</sup> calcd for C<sub>32</sub>H<sub>29</sub>N<sub>2</sub>BS<sub>3</sub>F<sub>2</sub>O<sub>4</sub>Na: 673.1248, Found: 673.1245.

### 13. NMR and HRMS Spectra

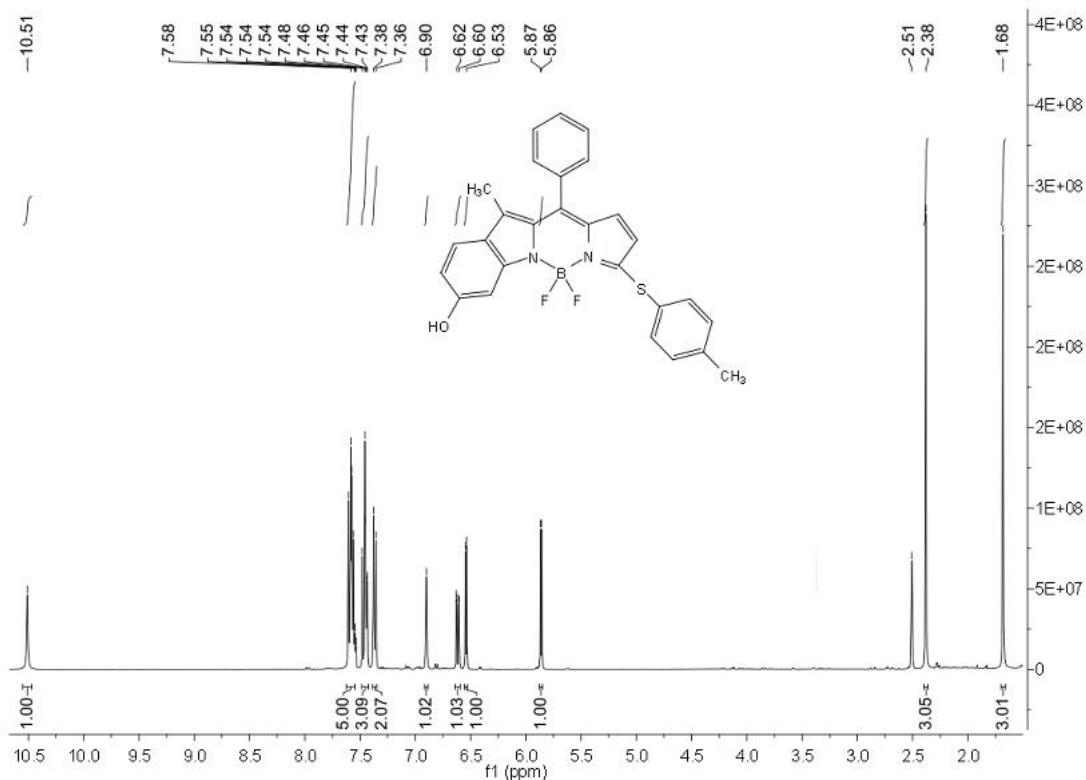

#### Elemental Composition Report

##### Single Mass Analysis

Tolerance = 30.0 mDa / DBE: min = -1.5, max = 100.0

Element prediction: Off

Number of isotope peaks used for i-FIT = 2

Monoisotopic Mass, Even Electron Ions

125 formula(e) evaluated with 13 results within limits (up to 1 closest results for each mass)

Elements Used:

C: 0-27 H: 0-25 B: 0-1 N: 0-2 O: 0-4 F: 0-2 S: 0-1

ZHAO-CC

ECUST Institute of Fine Chem

ZCC-WFY-009 78 (0.602) Cm (74:84)

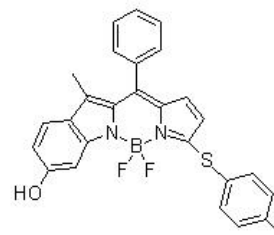

29-Sep-2013  
16:21:00  
1: TOF MS ES-  
1.47e+004

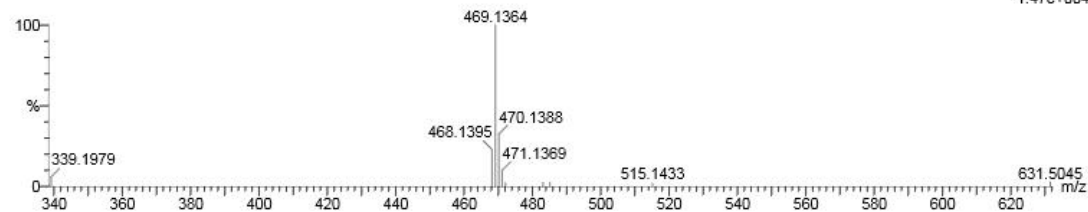

Minimum:

Maximum:

30.0

50.0

-1.5

100.0

Mass

Calc. Mass

mDa

PPM

DBE

i-FIT

i-FIT (Norm)

Formula

469.1364

469.1357

0.7

1.5

18.5

24.7

0.0

C27 H20 B N2 O F2 S



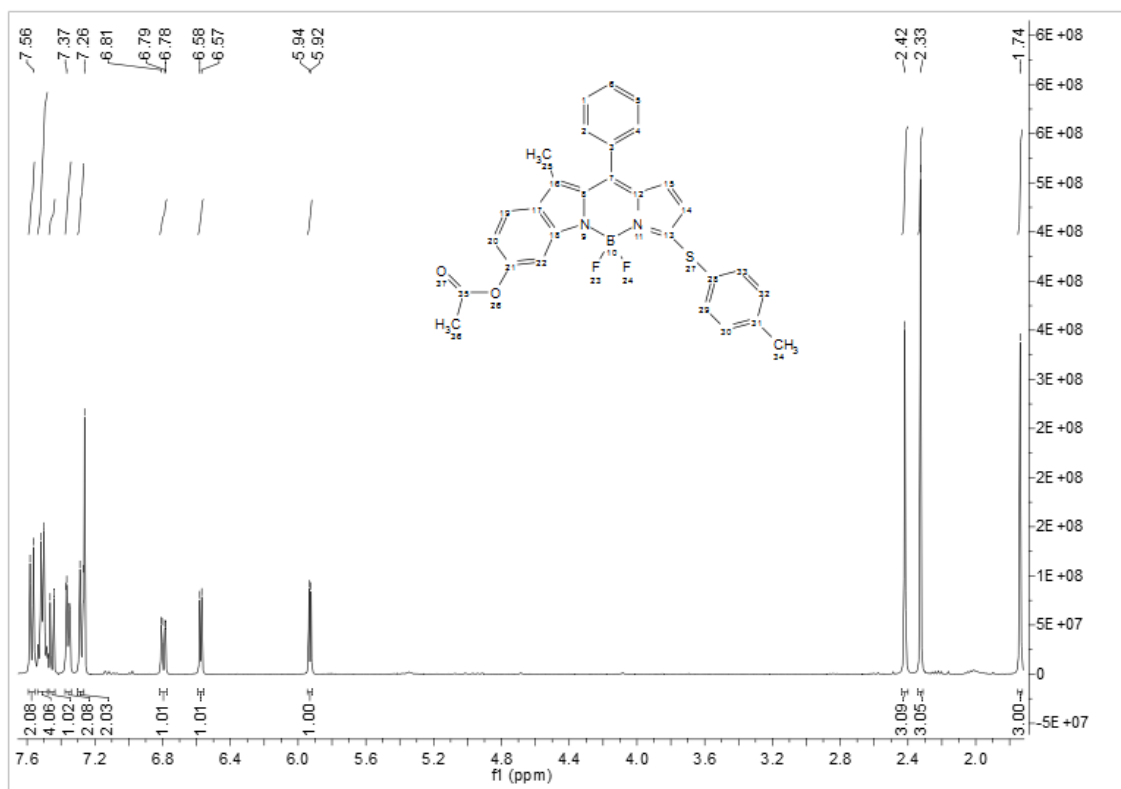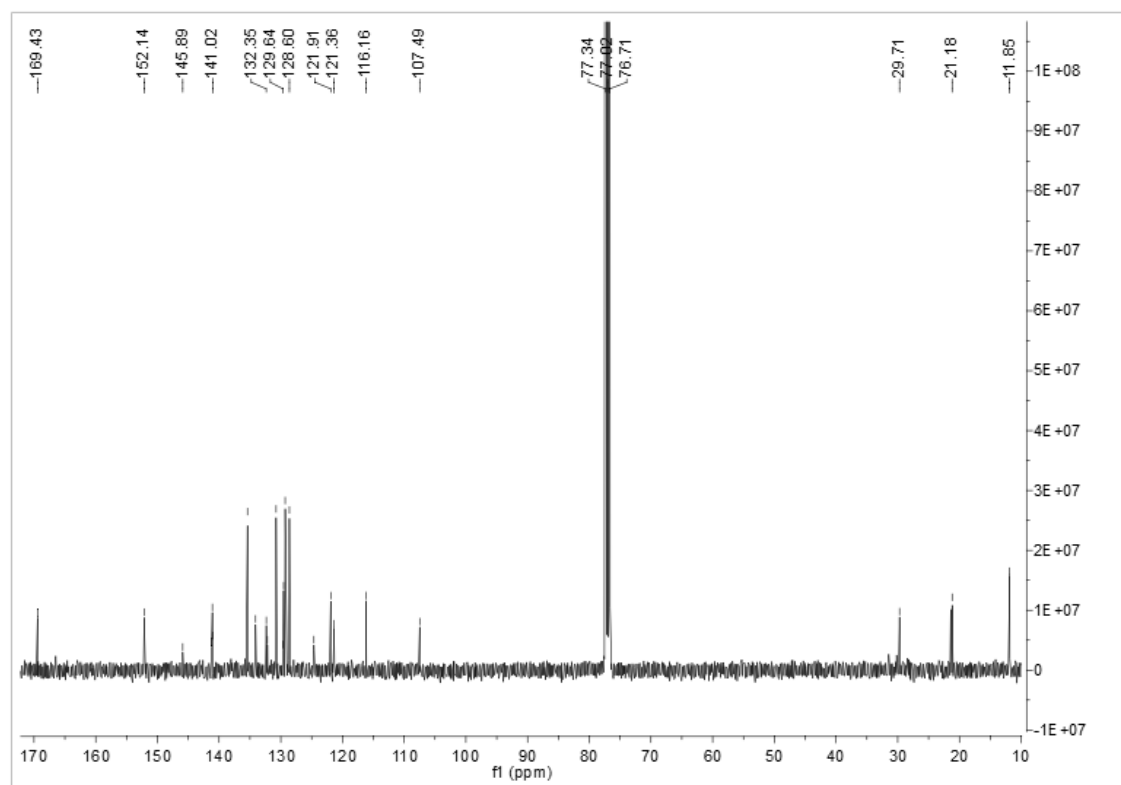

# Elemental Composition Report

Page 1

## Multiple Mass Analysis: 2 mass(es) processed

Tolerance = 5.0 PPM / DBE: min = -1.5, max = 100.0

Isotope cluster parameters: Separation = 1.0 Abundance = 1.0%

Monoisotopic Mass, Odd and Even Electron Ions

55248 formula(e) evaluated with 86 results within limits (up to 50 closest results for each mass)

ZC-WFY-002

L20141283 275 (4.585) Cm (275-(169:173+81:85))

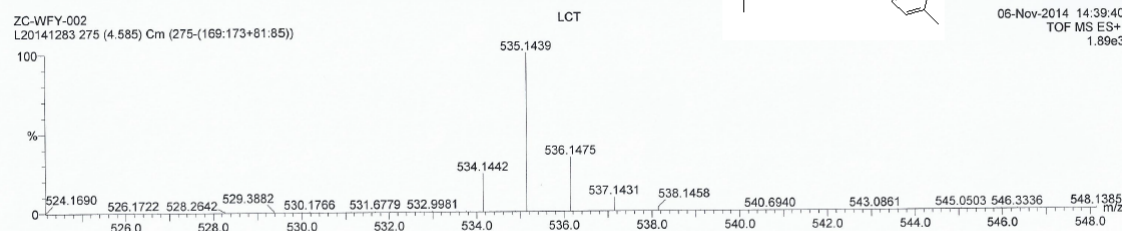

Minimum: 30.00  
Maximum: 100.00

| Mass     | RA     | Calc. Mass | mDa  | PPM  | DBE  | Score | Formula                   |
|----------|--------|------------|------|------|------|-------|---------------------------|
| 535.1439 | 100.00 | 535.1439   | 0.0  | 0.0  | 18.5 | n/a   | 12C29 H23 B N2 O2 F2 Na S |
|          |        | 535.1440   | -0.1 | -0.2 | 31.5 | n/a   | 12C37 13C H17 N3 F        |
|          |        | 535.1440   | -0.1 | -0.2 | 29.5 | n/a   | 12C37 H20 B N2 S          |
|          |        | 535.1441   | -0.2 | -0.3 | 24.0 | n/a   | 12C34 13C H21 O2 F2 Na    |
|          |        | 535.1437   | 0.2  | 0.4  | 27.0 | n/a   | 12C35 13C H20 B O3 Na     |

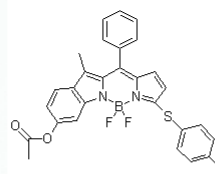

06-Nov-2014 14:39:40  
TOF MS ES+  
1.69e3

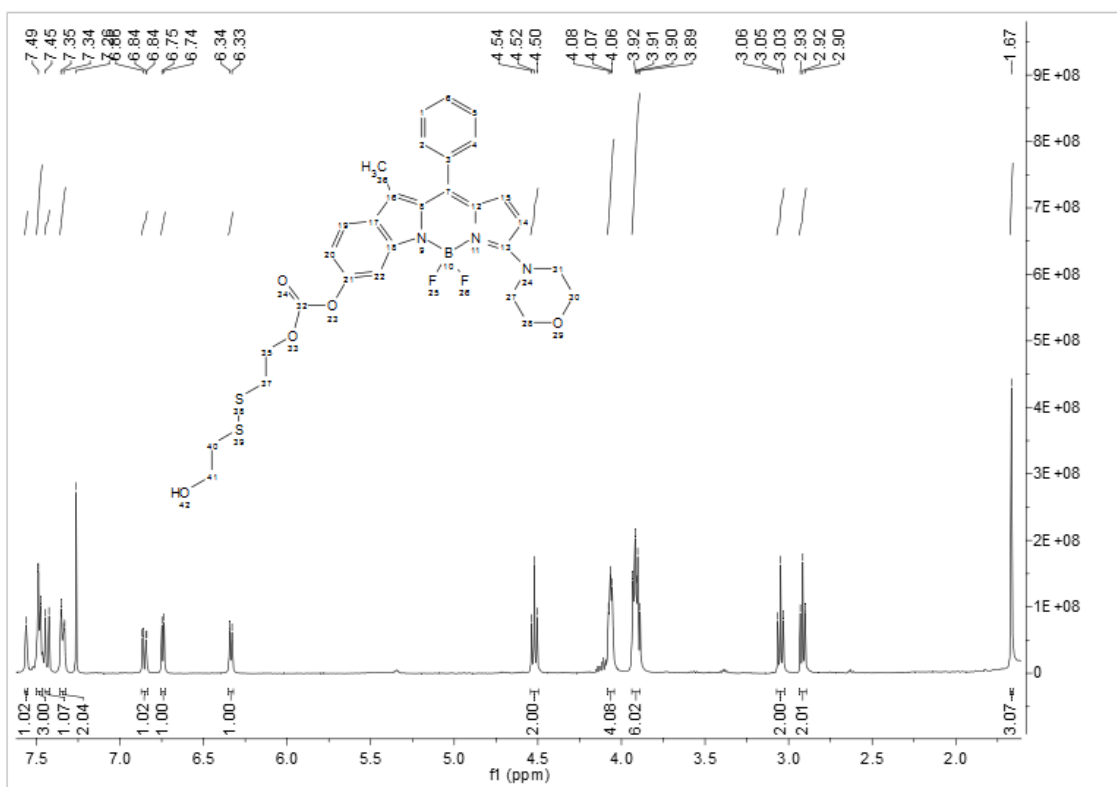

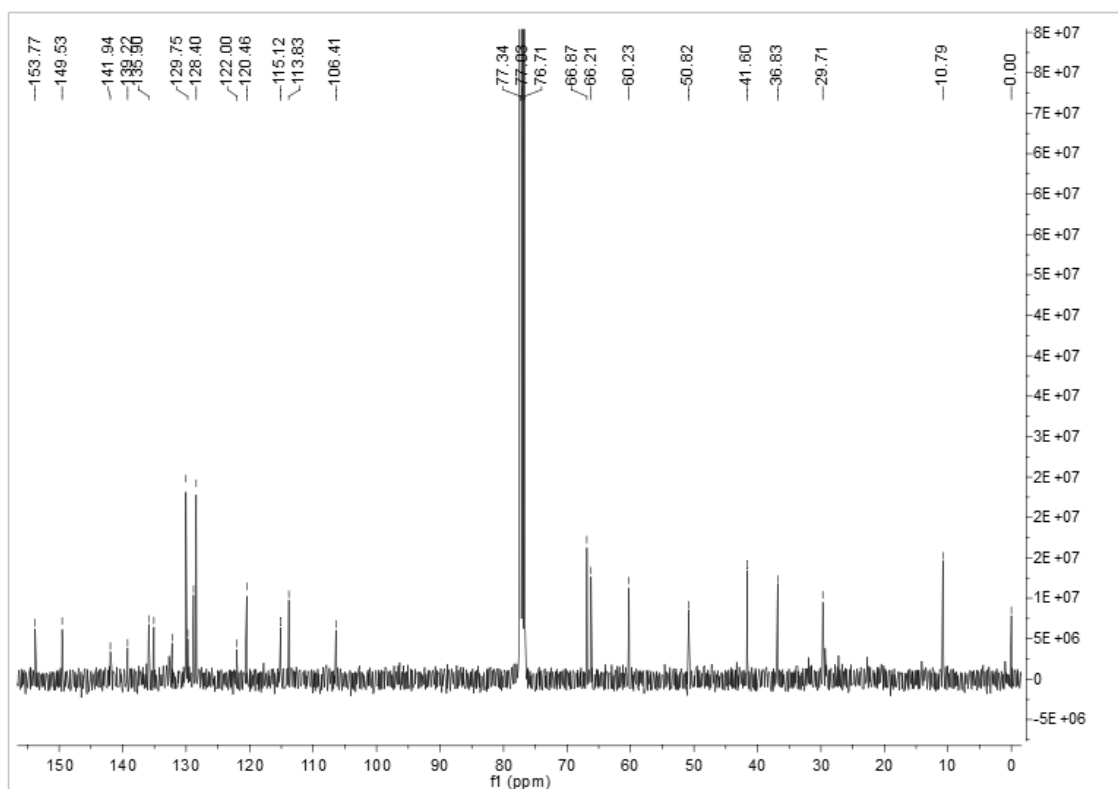

## Elemental Composition Report

Page 1

### Multiple Mass Analysis: 2 mass(es) processed

Tolerance = 5.0 PPM / DBE: min = -1.5, max = 100.0

Isotope cluster parameters: Separation = 1.0 Abundance = 1.0%

Monoisotopic Mass, Odd and Even Electron Ions

47469 formula(e) evaluated with 89 results within limits (up to 50 closest results for each mass)

ZC-WFY-001  
L20141284 247 (4.118) Cm (247-(156:164+111:117))

LCT

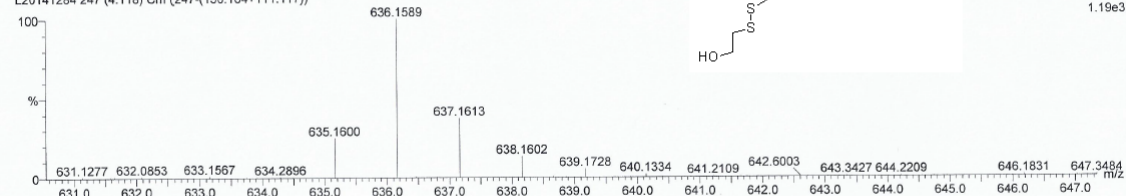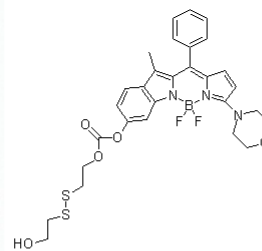

06-Nov-2014 14:53:54  
TOF MS ES+  
1.19e3

|          |        |            |      |      |       |       |         |                      |
|----------|--------|------------|------|------|-------|-------|---------|----------------------|
| Minimum: | 30.00  |            |      |      | -1.5  |       |         |                      |
| Maximum: | 100.00 |            |      |      | 100.0 |       |         |                      |
| Mass     | RA     | Calc. Mass | mDa  | PPM  | DBE   | Score | Formula |                      |
| 636.1589 | 100.00 | 636.1588   | 0.1  | 0.2  | 29.5  | n/a   | 12C38   | 13C H22 B N2 O4 F Na |
|          |        | 636.1586   | 0.3  | 0.5  | 15.5  | n/a   | 12C29   | H30 B N3 O5 F2 Na S2 |
|          |        | 636.1592   | -0.3 | -0.5 | 25.0  | n/a   | 12C34   | H23 B N4 O6 F Na     |
|          |        | 636.1585   | 0.4  | 0.6  | 26.0  | n/a   | 12C36   | H23 N4 O4 F2 Na      |
|          |        | 636.1593   | -0.4 | -0.7 | 27.5  | n/a   | 12C38   | H26 N3 O5 S          |

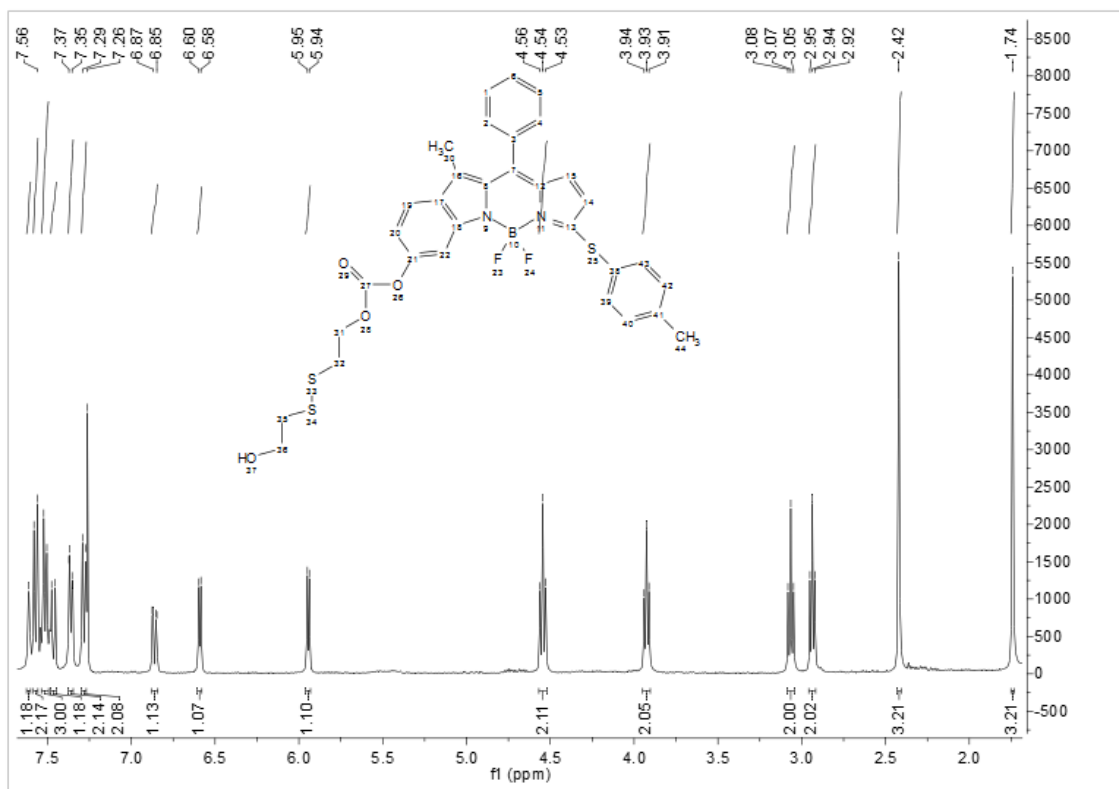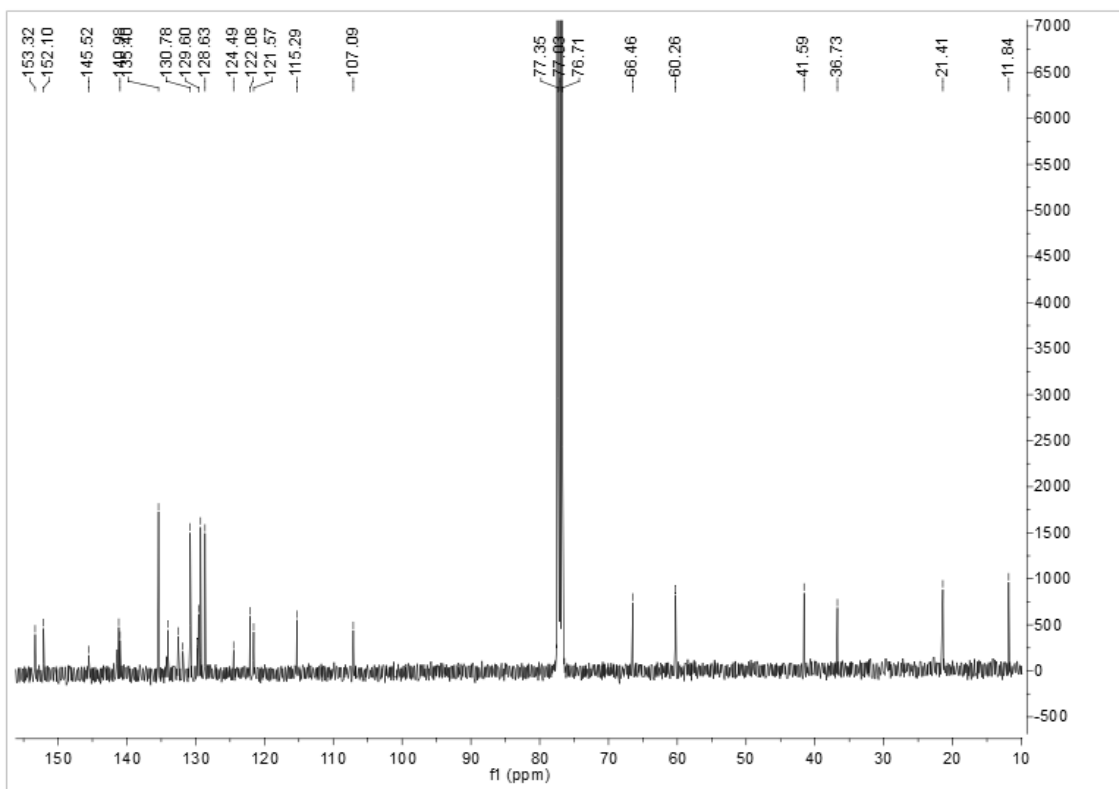

# Elemental Composition Report

Page 1

## Single Mass Analysis

Tolerance = 100.0 mDa / DBE: min = -1.5, max = 100.0

Element prediction: Off

Number of isotope peaks used for i-FIT = 2

Monoisotopic Mass, Even Electron Ions

740 formula(e) evaluated with 3 results within limits (up to 1 closest results for each mass)

Elements Used:

C: 0-32 H: 0-100 11B: 0-1 N: 0-2 O: 0-4 F: 0-2 Na: 0-1 S: 0-3

CC-ZHAO

ECUST Institute of Fine Chem

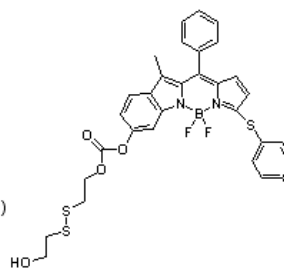

31-Dec-2012

16:04:31

1: TOF MS ES+

3.04e+003

ZCC-WFY-1211 27 (0.914) Cm (21:28)

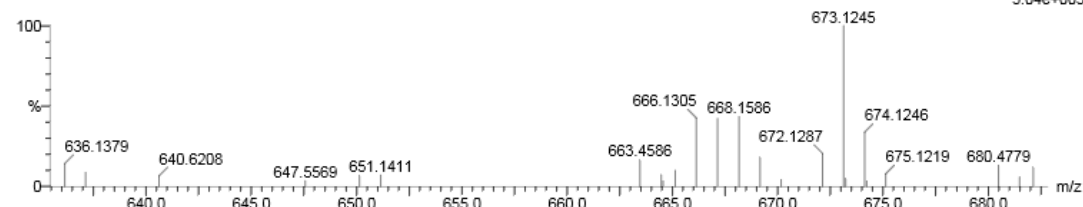

Minimum:

Maximum: 100.0 50.0 -1.5 100.0

| Mass     | Calc. Mass | mDa  | PPM  | DBE  | i-FIT | i-FIT (Norm) | Formula                    |
|----------|------------|------|------|------|-------|--------------|----------------------------|
| 673.1245 | 673.1248   | -0.3 | -0.4 | 18.5 | 31.6  | 0.0          | C32 H29 11B N2 O4 F2 Na S3 |

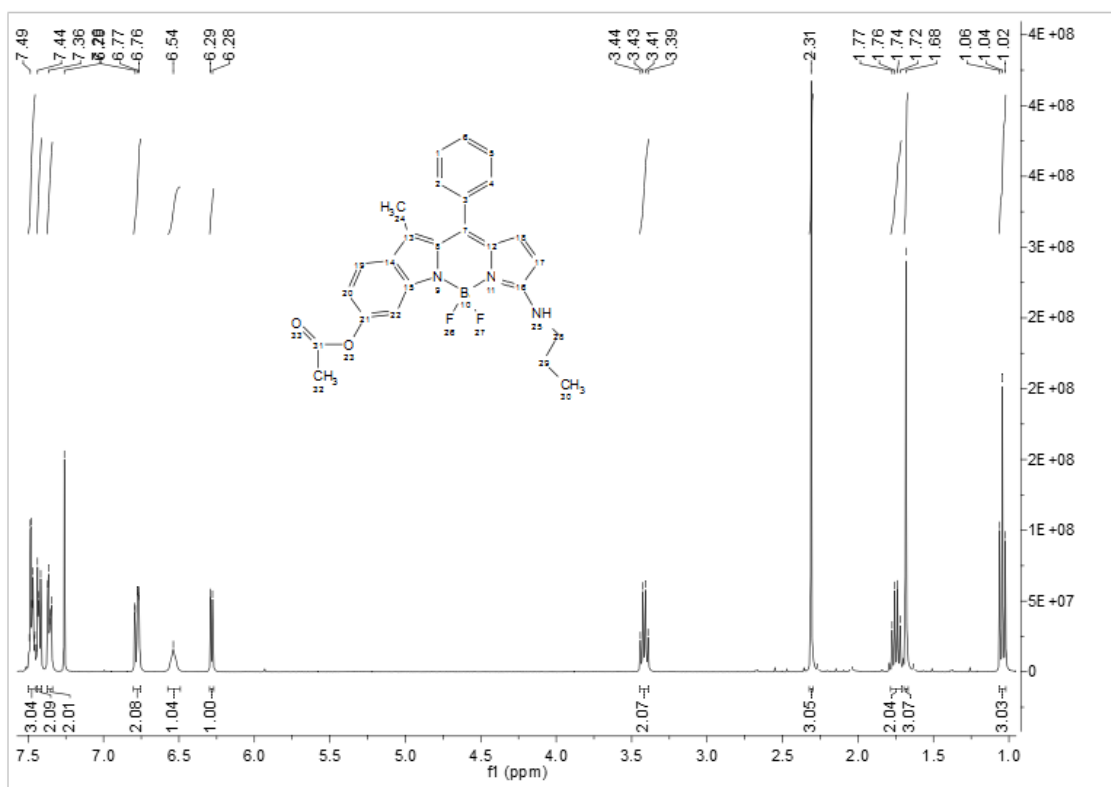

Supplement: c5sc00216h1.pdf [file c5sc00216h1.pdf]
